# Supplementary material
Source: PubMed Central journal article supplement (PMC5517622)
Supplement: halms1312384-supplement_1.pdf [file halms1312384-supplement_1.pdf]

### Supporting material Table 1.

Plasma matrix effect and extraction efficiency of healthy human plasma.

| Compound name                                                  | Matrix effect |             | Yield extraction |             |
|----------------------------------------------------------------|---------------|-------------|------------------|-------------|
|                                                                | 250 ng/mL     | 31.25 ng/mL | 250 ng/mL        | 31.25 ng/mL |
| <i>Adrenic acid</i>                                            |               |             |                  |             |
| <i>Ent-7(RS)-F<sub>2t</sub>-dihomo IsoP</i>                    | 66.8 ± 9.6    | 63.1 ± 8.2  | 63.2 ± 2.3       | 77.6 ± 1.2  |
| <i>17(RS)-F<sub>2t</sub>-dihomo IsoP</i>                       | 68.2 ± 9.2    | 69.1 ± 8.4  | 62.9 ± 2.8       | 83.9 ± 2.5  |
| <i>Arachidonic acid</i>                                        |               |             |                  |             |
| <i>15-epi-15-F<sub>2t</sub>-IsoP</i>                           | 70.5 ± 9.2    | 74.1 ± 7.7  | 58.9 ± 2.5       | 73.2 ± 2.0  |
| <i>15-F<sub>2t</sub>-IsoP</i>                                  | 68.6 ± 9.7    | 73.2 ± 9.0  | 59.6 ± 2.0       | 69.9 ± 2.3  |
| <i>5-F<sub>2t</sub>-IsoP</i>                                   | 64.7 ± 10.7   | 82.1 ± 7.6  | 61.3 ± 2.6       | 62.4 ± 10.5 |
| <i>5-epi-5-F<sub>2t</sub>-IsoP</i>                             | 69.2 ± 9.5    | 64.9 ± 10.3 | 58.0 ± 3.0       | 72.3 ± 8.0  |
| <i>2,3-dinor-15-F<sub>2t</sub>-IsoP</i>                        | 59.6 ± 8.2    | 57.0 ± 6.9  | 51.6 ± 0.9       | 71.1 ± 11.6 |
| <i>Ent-15(RS)-2,3-dinor-5,6-dihydro-15-F<sub>2t</sub>-IsoP</i> | 62.5 ± 9.3    | 73.6 ± 2.4  | 57.9 ± 0.9       | 79.1 ± 5.5  |
| <i>d<sub>4</sub>-15-F<sub>2t</sub>-IsoP</i>                    | 67.1 ± 8.8    |             | 69.8 ± 8.6       |             |
| <i>C21-15-F<sub>2t</sub>-IsoP</i>                              | 61.2 ± 8.6    |             | 79.2 ± 9.9       |             |
| <i>Alpha-Linolenic acid</i>                                    |               |             |                  |             |
| <i>Ent-16-epi-F<sub>1t</sub>-PhytoP</i>                        | 58.0 ± 8.7    | 53.5 ± 6.1  | 40.5 ± 2.1       | 58.3 ± 5.7  |
| <i>Ent-16-F<sub>1t</sub>-PhytoP</i>                            | 58.7 ± 8.6    | 53.8 ± 6.4  | 42.7 ± 1.6       | 60.4 ± 3.2  |
| <i>9-F<sub>1t</sub>-PhytoP</i>                                 | 56.7 ± 8.5    | 53.7 ± 5.5  | 46.7 ± 1.7       | 65.2 ± 7.3  |
| <i>9-epi-9-F<sub>1t</sub>-PhytoP</i>                           | 59.1 ± 8.9    | 51.8 ± 6.4  | 45.0 ± 1.2       | 67.1 ± 7.6  |
| <i>Eicosapentaenoic acid</i>                                   |               |             |                  |             |
| <i>8-F<sub>3t</sub>-IsoP</i>                                   | 65.5 ± 8.8    | 57.8 ± 8.2  | 54.0 ± 2.1       | 74.2 ± 4.9  |
| <i>8-epi-8-F<sub>3t</sub>-IsoP</i>                             | 64.5 ± 8.9    | 62.1 ± 6.2  | 55.5 ± 2.4       | 65.5 ± 3.4  |
| <i>5-F<sub>3t</sub>-IsoP</i>                                   | 59.9 ± 8.0    | 65.1 ± 6.4  | 104.9 ± 4.3      | 117.9 ± 5.8 |
| <i>5-epi-5-F<sub>3t</sub>-IsoP</i>                             | 64.7 ± 7.7    | 68.2 ± 8.9  | 112.0 ± 6.4      | 131.8 ± 0.6 |

*Docosahexaenoic acid*

|                                                            |             |            |            |             |
|------------------------------------------------------------|-------------|------------|------------|-------------|
| 10-F <sub>4t</sub> -NeuroP                                 | 75.3 ± 9.7  | 68.2 ± 9.8 | 54.9 ± 2.5 | 74.0 ± 5.4  |
| 10- <i>epi</i> -10-F <sub>4t</sub> -NeuroP                 | 72.5 ± 9.1  | 64.6 ± 8.4 | 55.7 ± 2.5 | 77.4 ± 0.1  |
| 14( <i>RS</i> )-14-F <sub>4t</sub> -NeuroP                 | 77.3 ± 8.1  | 82.6 ± 7.1 | 58.9 ± 4.8 | 52.0 ± 10.6 |
| 4( <i>RS</i> )-F <sub>4t</sub> -NeuroP                     | 73.1 ± 11.1 | 92.7 ± 4.0 | 61.0 ± 3.9 | 76.6 ± 0.1  |
| d <sub>4</sub> -10- <i>epi</i> -10-F <sub>4t</sub> -NeuroP | 66.2 ± 4.1  |            | 72.5 ± 7.2 |             |
| d <sub>4</sub> -10-F <sub>4t</sub> -NeuroP                 | 73.5 ± 4.7  |            | 68.1 ± 7.6 |             |
| d <sub>4</sub> -4( <i>RS</i> )-F <sub>4t</sub> -NeuroP     | 64.8 ± 12.1 |            | 63.8 ± 7.4 |             |

The matrix and extraction yield were tested by the addition of low and high concentration of the respective compounds as described in Section 2. IsoP: isoprostane; NeuroP: neuroprostane.

**Supporting material Table 2**

Repeatability and accuracy of the method for isoprostanes evaluation in human plasma.

| Compound                                    | Nominal conc.<br>(ng/mL) | Intraday      |       |            | Interday       |       |            |
|---------------------------------------------|--------------------------|---------------|-------|------------|----------------|-------|------------|
|                                             |                          | Measured      | RSD % | Accuracy % | Measured       | RSD % | Accuracy % |
| <i>Adrenic acid</i>                         |                          |               |       |            |                |       |            |
| <i>Ent-7(RS)-F<sub>2t</sub>-dihomo-IsoP</i> | 3.91                     | 3.91 ± 0.28   | 0.32  | 102.28     | 4.48 ± 0.81    | 18.04 | 114.61     |
|                                             | 31.25                    | 31.31 ± 0.37  | 0.24  | 101.53     | 33.79 ± 0.67   | 1.97  | 82.35      |
|                                             | 250                      | 256.91 ± 1.65 | 0.17  | 102.77     | 273.58 ± 4.50  | 1.65  | 111.12     |
| <i>17(RS)-F<sub>2t</sub>-dihomo-IsoP</i>    | 3.91                     | n.d           | n.d   | n.d        | n.d            | n.d   | n.d        |
|                                             | 31.25                    | 31.24 ± 1.77  | 0.16  | 96.37      | 26.41 ± 0.83   | 3.13  | 84.43      |
|                                             | 250                      | 253.60 ± 0.53 | 0.11  | 101.44     | 262.76 ± 7.84  | 2.98  | 105.10     |
| <i>Arachidonic acid</i>                     |                          |               |       |            |                |       |            |
| <i>15-epi-15-F<sub>2t</sub>-IsoP</i>        | 3.91                     | 3.96 ± 0.54   | 0.52  | 108.20     | 4.50 ± 0.18    | 4.02  | 115.29     |
|                                             | 31.25                    | 31.57 ± 1.04  | 0.42  | 97.39      | 33.44 ± 0.50   | 1.50  | 86.94      |
|                                             | 250                      | 254.41 ± 1.72 | 0.30  | 101.77     | 269.80 ± 10.52 | 3.90  | 104.69     |
| <i>15-F<sub>2t</sub>-IsoP</i>               | 3.91                     | 4.10 ± 0.27   | 0.47  | 108.82     | 4.21 ± 0.59    | 13.98 | 107.85     |
|                                             | 31.25                    | 30.94 ± 1.44  | 0.38  | 100.42     | 32.60 ± 0.45   | 1.39  | 84.51      |
|                                             | 250                      | 257.20 ± 4.92 | 0.27  | 102.88     | 275.25 ± 5.98  | 2.17  | 106.05     |
| <i>5-F<sub>2t</sub>-IsoP</i>                | 3.91                     | 3.64 ± 0.02   | 0.49  | 93.26      | 4.14 ± 0.37    | 8.91  | 105.95     |
|                                             | 31.25                    | 31.48 ± 0.60  | 0.33  | 99.68      | 30.02 ± 0.97   | 3.22  | 88.39      |

|    |                                         |       |               |      |        |               |       |        |
|----|-----------------------------------------|-------|---------------|------|--------|---------------|-------|--------|
| 1  |                                         |       |               |      |        |               |       |        |
| 2  |                                         |       |               |      |        |               |       |        |
| 3  |                                         |       |               |      |        |               |       |        |
| 4  |                                         |       |               |      |        |               |       |        |
| 5  |                                         |       |               |      |        |               |       |        |
| 6  |                                         | 250   | 260.76 ± 1.08 | 0.23 | 104.30 | 268.06 ± 3.60 | 1.34  | 107.19 |
| 7  | <i>5-epi-5-F<sub>2t</sub>-IsoP</i>      | 3.91  | 3.71 ± 0.13   | 0.35 | 93.84  | 3.79 ± 0.41   | 0.71  | 91.19  |
| 8  |                                         |       |               |      |        |               |       |        |
| 9  |                                         | 31.25 | 31.41 ± 0.86  | 0.26 | 102.67 | 32.24 ± 0.30  | 0.92  | 80.90  |
| 10 |                                         |       |               |      |        |               |       |        |
| 11 |                                         | 250   | 254.45 ± 5.61 | 0.17 | 101.78 | 271.10 ± 4.77 | 1.76  | 108.36 |
| 12 |                                         |       |               |      |        |               |       |        |
| 13 | <i>2,3-dinor-15-F<sub>2t</sub>-IsoP</i> | 3.91  | 3.50 ± 0.11   | 3.09 | 87.01  | 4.14 ± 0.52   | 12.56 | 105.99 |
| 14 |                                         |       |               |      |        |               |       |        |
| 15 |                                         | 31.25 | 31.39 ± 0.20  | 0.62 | 100.34 | 30.06 ± 0.49  | 1.64  | 84.98  |
| 16 |                                         |       |               |      |        |               |       |        |
| 17 |                                         | 250   | 253.89 ± 1.57 | 0.62 | 101.56 | 245.48 ± 8.11 | 3.30  | 98.61  |
| 18 | <i>Ent-15 -(RS)-2,3-</i>                | 3.91  | 3.97 ± 0.32   | 8.05 | 110.80 | 4.80 ± 0.41   | 8.44  | 115.53 |
| 19 | <i>dinor 5,6 dihydro-</i>               |       |               |      |        |               |       |        |
| 20 | <i>15-F<sub>2t</sub>-IsoP</i>           | 31.25 | 31.27 ± 0.71  | 2.27 | 99.21  | 33.17 ± 1.22  | 3.68  | 92.75  |
| 21 |                                         |       |               |      |        |               |       |        |
| 22 |                                         | 250   | 254.19 ± 1.94 | 0.09 | 101.67 | 237.99 ± 9.28 | 3.90  | 96.48  |
| 23 |                                         |       |               |      |        |               |       |        |
| 24 |                                         |       |               |      |        |               |       |        |
| 25 |                                         |       |               |      |        |               |       |        |
| 26 | <i>Alpha-Linolenic acid</i>             |       |               |      |        |               |       |        |
| 27 |                                         |       |               |      |        |               |       |        |
| 28 | <i>Ent-16-epi-16-F<sub>1t</sub>-</i>    | 3.91  | 3.37 ± 0.25   | 7.49 | 81.73  | 4.04 ± 0.19   | 4.63  | 103.49 |
| 29 | <i>PhytoP</i>                           |       |               |      |        |               |       |        |
| 30 |                                         | 31.25 | 31.39 ± 0.27  | 0.86 | 100.26 | 32.84 ± 0.55  | 1.68  | 87.89  |
| 31 |                                         |       |               |      |        |               |       |        |
| 32 |                                         | 250   | 252.93 ± 2.70 | 1.07 | 101.17 | 251.57 ± 7.61 | 3.02  | 100.06 |
| 33 |                                         |       |               |      |        |               |       |        |
| 34 | <i>Ent-16-F<sub>1t</sub>-PhytoP</i>     | 3.91  | 3.66 ± 0.18   | 4.93 | 95.35  | 3.94 ± 0.10   | 2.56  | 100.96 |
| 35 |                                         |       |               |      |        |               |       |        |
| 36 |                                         | 31.25 | 31.43 ± 0.22  | 0.70 | 100.12 | 31.82 ± 0.92  | 2.88  | 87.51  |
| 37 |                                         |       |               |      |        |               |       |        |
| 38 |                                         | 250   | 254.35 ± 2.88 | 1.13 | 101.74 | 246.90 ± 9.44 | 3.82  | 98.89  |
| 39 | <i>9-F<sub>1t</sub>-PhytoP</i>          | 3.91  | 3.64 ± 0.09   | 2.38 | 90.53  | 4.24 ± 0.02   | 0.47  | 108.65 |
| 40 |                                         |       |               |      |        |               |       |        |
| 41 |                                         | 31.25 | 31.31 ± 0.04  | 0.13 | 100.18 | 32.04 ± 0.87  | 2.71  | 85.74  |
| 42 |                                         |       |               |      |        |               |       |        |
| 43 |                                         | 250   | 257.24 ± 3.60 | 1.40 | 102.90 | 256.15 ± 8.56 | 3.34  | 101.28 |
| 44 |                                         |       |               |      |        |               |       |        |
| 45 |                                         |       |               |      |        |               |       |        |
| 46 |                                         |       |               |      |        |               |       |        |
| 47 |                                         |       |               |      |        |               |       |        |
| 48 |                                         |       |               |      |        |               |       |        |
| 49 |                                         |       |               |      |        |               |       |        |

|    |                                          |       |               |      |        |               |       |        |
|----|------------------------------------------|-------|---------------|------|--------|---------------|-------|--------|
| 1  |                                          |       |               |      |        |               |       |        |
| 2  |                                          |       |               |      |        |               |       |        |
| 3  |                                          |       |               |      |        |               |       |        |
| 4  |                                          |       |               |      |        |               |       |        |
| 5  |                                          |       |               |      |        |               |       |        |
| 6  | 9- <i>epi</i> -9-F <sub>1t</sub> -PhytoP | 3.91  | 3.57 ± 0.02   | 0.61 | 91.37  | 4.44 ± 0.28   | 6.22  | 113.55 |
| 7  |                                          | 31.25 | 31.31 ± 0.58  | 1.87 | 99.36  | 31.25 ± 0.84  | 2.70  | 85.27  |
| 8  |                                          | 250   | 256.35 ± 2.21 | 0.86 | 102.54 | 253.11 ± 7.69 | 3.04  | 100.54 |
| 9  |                                          |       |               |      |        |               |       |        |
| 10 |                                          |       |               |      |        |               |       |        |
| 11 |                                          |       |               |      |        |               |       |        |
| 12 |                                          |       |               |      |        |               |       |        |
| 13 | <i>Eicosapentaenoic acid</i>             |       |               |      |        |               |       |        |
| 14 |                                          |       |               |      |        |               |       |        |
| 15 | 8-F <sub>3t</sub> -IsoP                  | 3.91  | 3.48 ± 0.14   | 3.92 | 89.71  | 4.06 ± 0.77   | 18.90 | 103.87 |
| 16 |                                          | 31.25 | 31.15 ± 0.61  | 1.96 | 100.59 | 32.05 ± 0.69  | 2.16  | 88.59  |
| 17 |                                          | 250   | 253.18 ± 1.67 | 0.17 | 101.27 | 243.29 ± 8.38 | 3.45  | 97.93  |
| 18 |                                          |       |               |      |        |               |       |        |
| 19 |                                          |       |               |      |        |               |       |        |
| 20 | 8- <i>epi</i> -8-F <sub>3t</sub> -IsoP   | 3.91  | 3.57 ± 0.13   | 0.41 | 94.08  | 4.42 ± 0.29   | 6.53  | 113.12 |
| 21 |                                          | 31.25 | 31.48 ± 0.85  | 0.31 | 97.61  | 32.55 ± 1.19  | 3.66  | 89.77  |
| 22 |                                          | 250   | 252.98 ± 3.52 | 0.21 | 101.19 | 243.60 ± 4.45 | 1.83  | 97.99  |
| 23 |                                          |       |               |      |        |               |       |        |
| 24 |                                          |       |               |      |        |               |       |        |
| 25 | 5-F <sub>3t</sub> -IsoP                  | 3.91  | 3.85 ± 0.61   | 0.86 | 86.07  | 3.60 ± 0.26   | 7.17  | 92.08  |
| 26 |                                          | 31.25 | 31.02 ± 0.59  | 0.59 | 99.26  | 30.36 ± 1.21  | 3.97  | 89.52  |
| 27 |                                          | 250   | 254.47 ± 4.08 | 0.40 | 101.79 | 226.63 ± 5.18 | 2.29  | 93.51  |
| 28 |                                          |       |               |      |        |               |       |        |
| 29 |                                          |       |               |      |        |               |       |        |
| 30 |                                          |       |               |      |        |               |       |        |
| 31 | 5- <i>epi</i> -5-F <sub>3t</sub> -IsoP   | 3.91  | 3.75 ± 0.54   | 1.48 | 85.89  | 3.95 ± 0.26   | 6.57  | 101.03 |
| 32 |                                          | 31.25 | 31.19 ± 1.11  | 0.86 | 102.31 | 30.20 ± 1.82  | 6.01  | 88.80  |
| 33 |                                          | 250   | 254.04 ± 4.84 | 0.61 | 101.62 | 232.31 ± 8.13 | 3.50  | 95.10  |
| 34 |                                          |       |               |      |        |               |       |        |
| 35 |                                          |       |               |      |        |               |       |        |
| 36 |                                          |       |               |      |        |               |       |        |
| 37 | <i>Docosahexaenoic acid</i>              |       |               |      |        |               |       |        |
| 38 |                                          |       |               |      |        |               |       |        |
| 39 | 10-F <sub>4t</sub> -NeuroP               | 3.91  | 3.47 ± 0.20   | 0.19 | 93.71  | 3.76 ± 0.11   | 2.81  | 96.17  |
| 40 |                                          | 31.25 | 31.27 ± 0.96  | 0.16 | 103.17 | 32.18 ± 0.37  | 1.16  | 85.61  |
| 41 |                                          | 250   | 256.74 ± 1.01 | 0.10 | 102.70 | 259.93 ± 3.98 | 1.53  | 102.25 |
| 42 |                                          |       |               |      |        |               |       |        |
| 43 |                                          |       |               |      |        |               |       |        |
| 44 |                                          |       |               |      |        |               |       |        |
| 45 |                                          |       |               |      |        |               |       |        |
| 46 |                                          |       |               |      |        |               |       |        |
| 47 |                                          |       |               |      |        |               |       |        |
| 48 |                                          |       |               |      |        |               |       |        |
| 49 |                                          |       |               |      |        |               |       |        |

1  
2  
3  
4  
5  
6  
7  
8  
9  
10  
11  
12  
13  
14  
15  
16  
17  
18  
19  
20  
21  
22  
23  
24  
25  
26  
27  
28  
29  
30  
31  
32  
33  
34  
35  
36  
37  
38  
39  
40  
41  
42  
43  
44  
45  
46  
47  
48  
49

|                                            |       |               |      |        |                |       |        |
|--------------------------------------------|-------|---------------|------|--------|----------------|-------|--------|
| 10- <i>epi</i> -10-F <sub>4t</sub> -NeuroP | 3.91  | 3.75 ± 0.16   | 0.22 | 95.14  | 3.94 ± 0.47    | 11.83 | 100.92 |
|                                            | 31.25 | 31.29 ± 0.16  | 0.17 | 99.53  | 31.72 ± 0.70   | 2.22  | 84.31  |
|                                            | 250   | 256.15 ± 3.60 | 0.12 | 102.46 | 262.56 ± 1.97  | 0.75  | 102.93 |
| 14( <i>RS</i> )-14-F <sub>4t</sub> -NeuroP | 3.91  | n.d           | n.d  | n.d    | n.d            | n.d   | n.d    |
|                                            | 31.25 | 33.66 ± 0.83  | 5.49 | 109.19 | 29.42 ± 2.84   | 9.66  | 94.15  |
|                                            | 250   | 255.05 ± 9.44 | 4.32 | 102.02 | 258.99 ± 16.26 | 6.25  | 97.67  |
| 4( <i>RS</i> )-F <sub>4t</sub> -NeuroP     | 3.91  | n.d           | n.d  | n.d    | n.d            | n.d   | n.d    |
|                                            | 31.25 | 31.41 ± 2.40  | 2.03 | 101.15 | 35.16 ± 3.18   | 9.04  | 93.60  |
|                                            | 250   | 256.93 ± 3.24 | 1.46 | 102.77 | 261.07 ± 3.00  | 1.15  | 102.47 |

---

Three nominal concentrations of the compounds were used to assess the stability of the compounds within the day (intraday) and between 15 days intervals (interday). IsoP: isoprostane; NeuroP: neuroprostane; IsoF: isofuran.
